# Supplementary material
Source: PubMed Central journal article supplement (PMC3073022)
Supplement: NIHMS269283-supplement-1.pdf [file NIHMS269283-supplement-1.pdf]

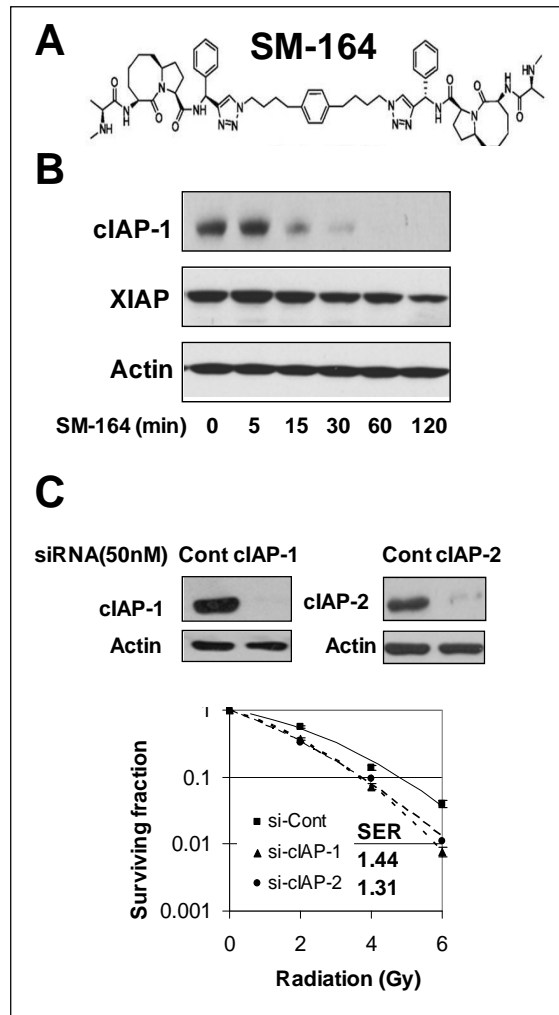

**Figure S1. Targeting cIAP-1 for radiosensitization in HNSCC cells: (A) SM-164 structure, (B) Time-dependent degradation of cIAP-1 by SM-164.** UMSCC-1 cells were treated with SM-164 (10 nM) for indicated time periods, followed by Western blotting analysis. **(C) Radiosensitization of UMSCC-1 cells by siRNA silencing of cIAP-1 and cIAP-2:** UMSCC-1 cells were transiently transfected with Dharmacon's siGENOME SMARTpool against cIAP-1 or cIAP-2, respectively, along with scrambled siRNA control. Forty-hours later, one portion of cells was subjected to Western blotting (top panels) and another portion was used for clonogenic assay (bottom panel). SER was calculated as the ratio of the mean inactivation dose under scrambled siRNA control conditions divided by the mean inactivation dose after cIAP-1/2 silencing. Shown is mean  $\pm$  SEM (n=3).
